# Supplementary material for: Low-temperature synthesis of tetrapod CdSe/CdS quantum dots through a microfluidic reactor
Source: Royal Society of Chemistry journal article supplement (doi:10.1039/d1nr04070g), 2021-01-01
Supplement: d1nr04070g1.pdf [file d1nr04070g1.pdf]

## Electronic Supplementary Information

### Low-Temperature Synthesis of Tetrapod CdSe/CdS QDs through Microfluidic Reactor

Weishuo Xing, Shuang Zhang, Ruoting An, Wengang Bi, Chong Geng\*, Shu Xu\*

Tianjin Key Laboratory of Electronic Materials and Devices, School of Electronics and Information Engineering, Hebei University of Technology, Tianjin, P. R. China.

\*Corresponding authors. *E-mail*: [gengchong@hebut.edu.cn](mailto:gengchong@hebut.edu.cn); [shu.xu@hebut.edu.cn](mailto:shu.xu@hebut.edu.cn)

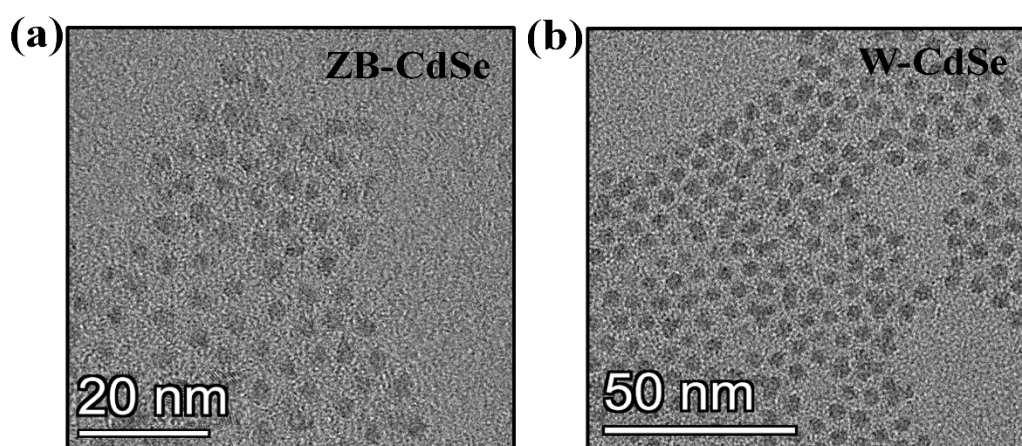

**Fig. S1.** TEM images of zinc blende CdSe (a) and wurtzite CdSe (b).

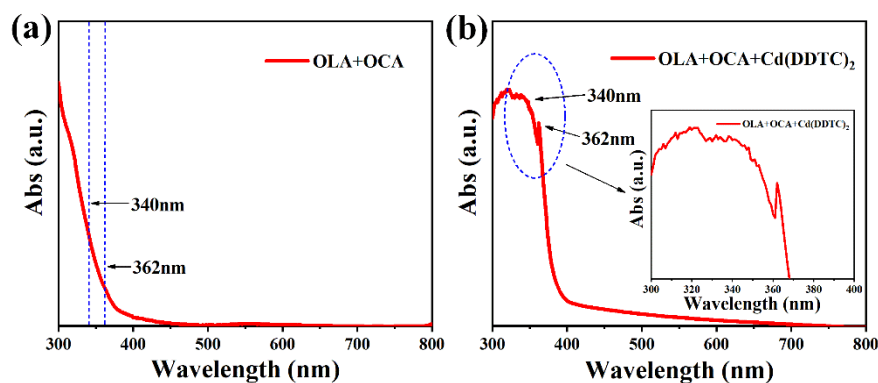

**Fig. S2.** Absorption spectra of the solutions of (a) mixed OLA and OCA, and (b) mixed OLA, OCA and Cd(DDTC)<sub>2</sub>.

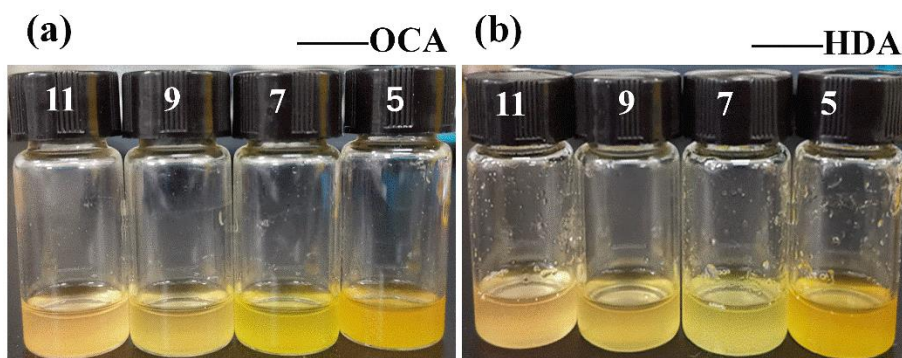

**Fig. S3.** Photos of tetrapod CdSe/CdS QD solutions prepared at different flow rate (ml/h) with using OCA (c) and HDA (d).

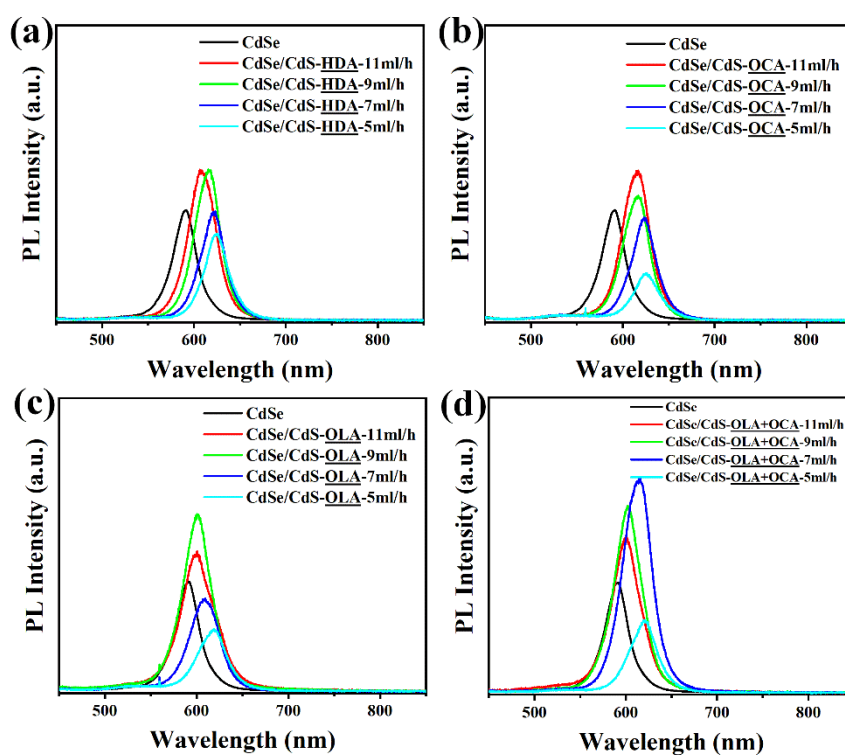

**Fig. S4.** PL spectra of tetrapod CdSe/CdS QDs prepared at different flow rates with different amine ligands.

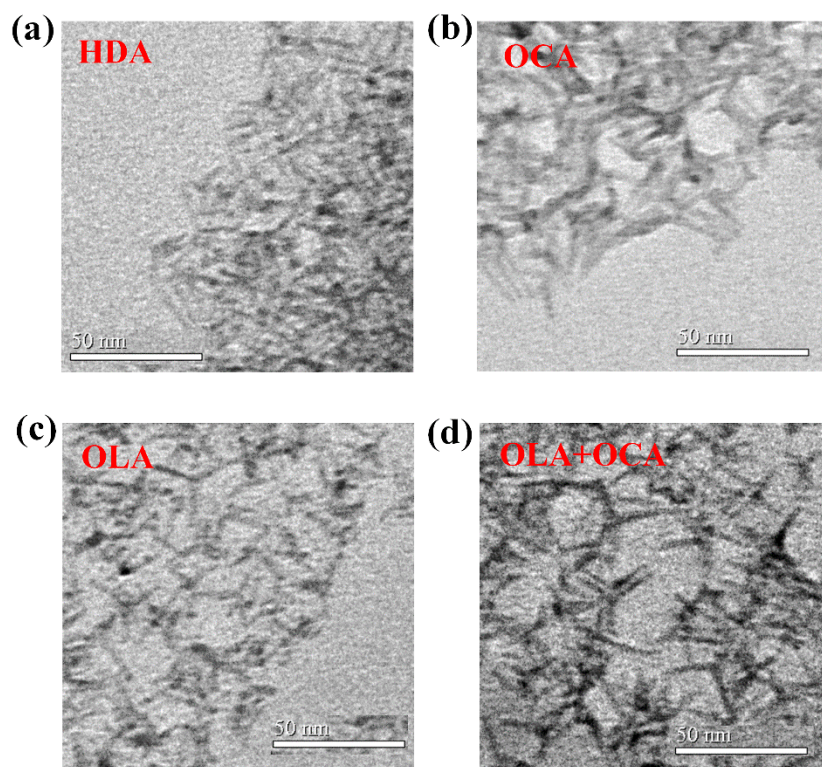

**Fig. S5.** TEM images of tetrapod CdSe/CdS QDs prepared with different amine ligands.

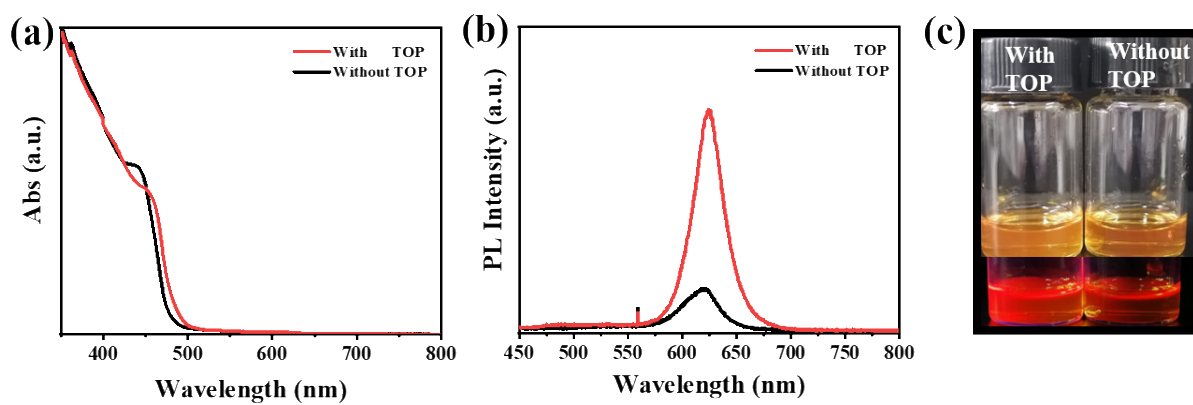

**Fig. S6.** (a) UV-Vis, (b) PL spectra and (c) photos under room light (up) and UV light (down) of tetrapod QDs synthesized with and without TOP.

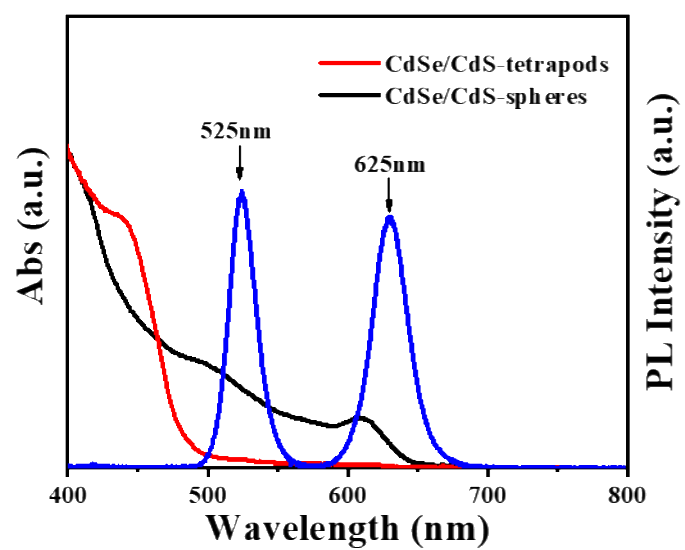

**Fig. S7.** PL and UV-Vis absorption spectra of mixed green-emission spherical CdSe/CdS QDs and red-emission spherical and tetrapod CdSe/CdS QDs.
